# Supplementary material for: Measuring information density in interlanguage through entropy analysis
Source: Sci Rep. 2026 Jun 16;16:18672. doi: 10.1038/s41598-026-56853-3 (PMC13273071; doi:10.1038/s41598-026-56853-3)
Supplement: Supplementary file 4 — Supplementary Material 4 [file 41598_2026_56853_MOESM4_ESM.xlsx]

## Sheet: Sheet1
ONEWAY Hlex PCI IDS_Total KLgram_Inv CR_Inv BY Group_A
/STATISTICS DESCRIPTIVES HOMOGENEITY WELCH
/MISSING ANALYSIS
/POSTHOC=GH ALPHA(0.05).
Oneway
Notes
Output Created		01-APR-2026 17:18:10
Comments
Input	Active Dataset	$DataSet
	Filter	<none>
	Weight	<none>
	Split File	<none>
	N of Rows in Working Data File	200
Missing Value Handling	Definition of Missing	User-defined missing values are treated as missing.
	Cases Used	Statistics for each analysis are based on cases with no missing data for any variable in the analysis.
Syntax		ONEWAY Hlex PCI IDS_Total KLgram_Inv CR_Inv BY Group_A /STATISTICS DESCRIPTIVES HOMOGENEITY WELCH /MISSING ANALYSIS /POSTHOC=GH ALPHA(0.05).
Resources	Processor Time	00:00:00.19
	Elapsed Time	00:00:00.18
Descriptives
		N	Mean	Std. Deviation	Std. Error	95% Confidence Interval for Mean		Minimum	Maximum
						Lower Bound	Upper Bound
Hlex	B1	45	4.13133	0.0866445	0.0129162	4.1053	4.15736	3.82	4.25
	B2	55	4.40436	0.112805	0.0152107	4.37387	4.43486	3.95	4.55
	C1	43	4.83674	0.0346218	0.00527978	4.82609	4.8474	4.75	4.95
	L1	57	5.20193	0.148209	0.0196307	5.1626	5.24125	4.81	5.42
	Total	200	4.6632	0.428569	0.0303044	4.60344	4.72296	3.82	5.42
PCI	B1	45	0.893778	0.0315716	0.00470642	0.884293	0.903263	0.81	0.94
	B2	55	1.04382	0.0581024	0.00783453	1.02811	1.05953	0.83	1.12
	C1	43	1.19116	0.0173493	0.00264574	1.18582	1.1965	1.15	1.25
	L1	57	1.26807	0.0350733	0.00464557	1.25876	1.27738	1.18	1.35
	Total	200	1.10565	0.147953	0.0104618	1.08502	1.12628	0.81	1.35
IDS_Total	B1	45	4.23222	0.0843124	0.0125686	4.20689	4.25755	3.98	4.36
	B2	55	5.022	0.277051	0.0373575	4.9471	5.0969	4.05	5.25
	C1	43	5.90023	0.0400291	0.00610437	5.88791	5.91255	5.82	6.05
	L1	57	6.3886	0.193339	0.0256084	6.3373	6.4399	5.88	6.72
	Total	200	5.4226	0.84535	0.0597753	5.30473	5.54047	3.98	6.72
KLgram_Inv	B1	45	5.148	0.0894834	0.0133394	5.12112	5.17488	4.89	5.3
	B2	55	5.47745	0.131575	0.0177415	5.44188	5.51302	4.98	5.62
	C1	43	6.03372	0.0301601	0.00459938	6.02444	6.043	5.95	6.12
	L1	57	6.77404	0.281011	0.0372209	6.69947	6.8486	6.02	6.9
	Total	200	5.89245	0.654774	0.0462995	5.80115	5.98375	4.89	6.9
CR_Inv	B1	45	6.33778	0.0163608	0.00243893	6.33286	6.34269	6.29	6.37
	B2	55	6.38	0.02	0.0026968	6.37459	6.38541	6.3	6.4
	C1	43	6.42116	0.0085103	0.00129781	6.41854	6.42378	6.41	6.44
	L1	57	6.47368	0.0224111	0.00296842	6.46774	6.47963	6.41	6.5
	Total	200	6.40605	0.0540881	0.00382461	6.39851	6.41359	6.29	6.5
Test of Homogeneity of Variances
	Levene Statistic	df1	df2	Sig.
Hlex	6.67465	3	196	0.000258959
PCI	4.14156	3	196	0.00712313
IDS_Total	7.81739	3	196	5.90515e-05
KLgram_Inv	14.2319	3	196	1.98627e-08
CR_Inv	3.30585	3	196	0.0213029
ANOVA
		Sum of Squares	df	Mean Square	F	Sig.
Hlex	Between Groups	34.2526	3	11.4175	973.861	1.91735e-117
	Within Groups	2.2979	196	0.011724
	Total	36.5506	199
PCI	Between Groups	4.04843	3	1.34948	859.636	1.7248e-112
	Within Groups	0.307686	196	0.00156982
	Total	4.35612	199
IDS_Total	Between Groups	135.591	3	45.1969	1338.51	3.05816e-130
	Within Groups	6.61824	196	0.0337665
	Total	142.209	199
KLgram_Inv	Between Groups	79.5696	3	26.5232	904.482	1.66894e-114
	Within Groups	5.74754	196	0.0293242
	Total	85.3171	199
CR_Inv	Between Groups	0.517634	3	0.172545	523.948	2.60656e-93
	Within Groups	0.064546	196	0.000329316
	Total	0.58218	199
Robust Tests of Equality of Means
		Statistica	df1	df2	Sig.
Hlex	Welch	1181.83	3	98.9246	2.64903e-77
PCI	Welch	1323.29	3	104.748	4.34411e-83
IDS_Total	Welch	5080.65	3	98.3259	1.196e-107
KLgram_Inv	Welch	1679.02	3	94.2841	1.14764e-81
CR_Inv	Welch	503.301	3	104.61	5.46782e-62
a. Asymptotically F distributed.
Post Hoc Tests
Multiple Comparisons
Games-Howell
Dependent Variable			Mean Difference (I-J)	Std. Error	Sig.	95% Confidence Interval
						Lower Bound	Upper Bound
Hlex	B1	B2	-.273*	0.0199548	5.16476e-13	-0.325189	-0.220872
		C1	-.705*	0.0139537	6.07958e-13	-0.742316	-0.668506
		L1	-1.071*	0.0234988	5.18141e-13	-1.13207	-1.00912
	B2	B1	.273*	0.0199548	5.16476e-13	0.220872	0.325189
		C1	-.432*	0.016101	5.93969e-13	-0.474809	-0.389952
		L1	-.798*	0.0248341	4.98934e-13	-0.862405	-0.732727
	C1	B1	.705*	0.0139537	6.07958e-13	0.668506	0.742316
		B2	.432*	0.016101	5.93969e-13	0.389952	0.474809
		L1	-.365*	0.0203284	5.75429e-13	-0.41881	-0.311562
	L1	B1	1.071*	0.0234988	5.18141e-13	1.00912	1.13207
		B2	.798*	0.0248341	4.98934e-13	0.732727	0.862405
		C1	.365*	0.0203284	5.75429e-13	0.311562	0.41881
PCI	B1	B2	-.150*	0.00913949	5.6144e-13	-0.173984	-0.126096
		C1	-.297*	0.0053991	5.90639e-13	-0.3116	-0.28317
		L1	-.374*	0.006613	5.09925e-13	-0.391576	-0.357009
	B2	B1	.150*	0.00913949	5.6144e-13	0.126096	0.173984
		C1	-.147*	0.00826921	5.87197e-13	-0.169141	-0.125549
		L1	-.224*	0.00910831	5.48561e-13	-0.248104	-0.2004
	C1	B1	.297*	0.0053991	5.90639e-13	0.28317	0.3116
		B2	.147*	0.00826921	5.87197e-13	0.125549	0.169141
		L1	-.077*	0.00534615	5.65437e-13	-0.0909138	-0.062901
	L1	B1	.374*	0.006613	5.09925e-13	0.357009	0.391576
		B2	.224*	0.00910831	5.48561e-13	0.2004	0.248104
		C1	.077*	0.00534615	5.65437e-13	0.062901	0.0909138
IDS_Total	B1	B2	-.790*	0.0394151	5.55667e-13	-0.89367	-0.685886
		C1	-1.668*	0.0139725	5.74207e-13	-1.70488	-1.63115
		L1	-2.156*	0.0285265	5.65104e-13	-2.23122	-2.08153
	B2	B1	.790*	0.0394151	5.55667e-13	0.685886	0.89367
		C1	-.878*	0.037853	6.32161e-13	-0.978416	-0.778049
		L1	-1.367*	0.0452921	5.25802e-13	-1.48501	-1.24818
	C1	B1	1.668*	0.0139725	5.74207e-13	1.63115	1.70488
		B2	.878*	0.037853	6.32161e-13	0.778049	0.978416
		L1	-.488*	0.0263259	5.78204e-13	-0.557859	-0.418869
	L1	B1	2.156*	0.0285265	5.65104e-13	2.08153	2.23122
		B2	1.367*	0.0452921	5.25802e-13	1.24818	1.48501
		C1	.488*	0.0263259	5.78204e-13	0.418869	0.557859
KLgram_Inv	B1	B2	-.32945*	0.0221969	5.0504e-13	-0.387501	-0.271408
		C1	-.88572*	0.0141101	5.90528e-13	-0.923119	-0.848323
		L1	-1.62604*	0.039539	6.04072e-13	-1.7301	-1.52197
	B2	B1	.32945*	0.0221969	5.0504e-13	0.271408	0.387501
		C1	-.55627*	0.018328	5.68878e-13	-0.604673	-0.50786
		L1	-1.29658*	0.0412329	5.55667e-13	-1.40477	-1.18839
	C1	B1	.88572*	0.0141101	5.90528e-13	0.848323	0.923119
		B2	.55627*	0.018328	5.68878e-13	0.50786	0.604673
		L1	-.74031*	0.037504	6.04738e-13	-0.839531	-0.641097
	L1	B1	1.62604*	0.039539	6.04072e-13	1.52197	1.7301
		B2	1.29658*	0.0412329	5.55667e-13	1.18839	1.40477
		C1	.74031*	0.037504	6.04738e-13	0.641097	0.839531
CR_Inv	B1	B2	-.04222*	0.00363608	4.96714e-13	-0.0517257	-0.0327187
		C1	-.08339*	0.00276273	5.62439e-13	-0.0906644	-0.0761056
		L1	-.13591*	0.00384186	5.14699e-13	-0.145945	-0.125868
	B2	B1	.04222*	0.00363608	4.96714e-13	0.0327187	0.0517257
		C1	-.04116*	0.00299283	5.80203e-13	-0.0490229	-0.0333027
		L1	-.09368*	0.00401051	4.40314e-13	-0.104148	-0.0832208
	C1	B1	.08339*	0.00276273	5.62439e-13	0.0761056	0.0906644
		B2	.04116*	0.00299283	5.80203e-13	0.0333027	0.0490229
		L1	-.05252*	0.00323972	5.86642e-13	-0.0610321	-0.0440107
	L1	B1	.13591*	0.00384186	5.14699e-13	0.125868	0.145945
		B2	.09368*	0.00401051	4.40314e-13	0.0832208	0.104148
		C1	.05252*	0.00323972	5.86642e-13	0.0440107	0.0610321
*. The mean difference is significant at the 0.05 level.
