# Supplementary material for: Measuring information density in interlanguage through entropy analysis
Source: Sci Rep. 2026 Jun 16;16:18672. doi: 10.1038/s41598-026-56853-3 (PMC13273071; doi:10.1038/s41598-026-56853-3)
Supplement: Supplementary file 5 — Supplementary Material 5 [file 41598_2026_56853_MOESM5_ESM.xlsx]

## Sheet: Sheet1
GET DATA /TYPE=XLSX
/FILE='C:\Users\Mobi lap\Desktop\محمد امين\200.xlsx'
/SHEET=name 'Dataset'
/CELLRANGE=full
/READNAMES=on
/ASSUMEDSTRWIDTH=32767.
EXECUTE.
DATASET NAME $DataSet WINDOW=FRONT.
COMPUTE KLgram_Inv=7.0 - KLgram.
EXECUTE.
COMPUTE CR_Inv=7.0 - CR_Inv.
EXECUTE.
COMPUTE CR_Inv=7.0 - CR.
EXECUTE.
EXAMINE VARIABLES=Hlex PCI IDS_Total KLgram_Inv CR_Inv BY CEFR
/PLOT BOXPLOT STEMLEAF NPPLOT SPREADLEVEL
/COMPARE GROUPS
/STATISTICS DESCRIPTIVES
/CINTERVAL 95
/MISSING LISTWISE
/NOTOTAL.
Explore
Notes
Output Created		01-APR-2026 17:09:17
Comments
Input	Active Dataset	$DataSet
	Filter	<none>
	Weight	<none>
	Split File	<none>
	N of Rows in Working Data File	200
Missing Value Handling	Definition of Missing	User-defined missing values for dependent variables are treated as missing.
	Cases Used	Statistics are based on cases with no missing values for any dependent variable or factor used.
Syntax		EXAMINE VARIABLES=Hlex PCI IDS_Total KLgram_Inv CR_Inv BY CEFR /PLOT BOXPLOT STEMLEAF NPPLOT SPREADLEVEL /COMPARE GROUPS /STATISTICS DESCRIPTIVES /CINTERVAL 95 /MISSING LISTWISE /NOTOTAL.
Resources	Processor Time	00:00:31.94
	Elapsed Time	00:00:32.79
[$DataSet]
CEFR
Case Processing Summary
CEFR		Cases
		Valid		Missing		Total
		N	Percent	N	Percent	N	Percent
Hlex	B1	50	1	0	0	50	1
	B2	50	1	0	0	50	1
	C1	50	1	0	0	50	1
	L1	50	1	0	0	50	1
PCI	B1	50	1	0	0	50	1
	B2	50	1	0	0	50	1
	C1	50	1	0	0	50	1
	L1	50	1	0	0	50	1
IDS_Total	B1	50	1	0	0	50	1
	B2	50	1	0	0	50	1
	C1	50	1	0	0	50	1
	L1	50	1	0	0	50	1
KLgram_Inv	B1	50	1	0	0	50	1
	B2	50	1	0	0	50	1
	C1	50	1	0	0	50	1
	L1	50	1	0	0	50	1
CR_Inv	B1	50	1	0	0	50	1
	B2	50	1	0	0	50	1
	C1	50	1	0	0	50	1
	L1	50	1	0	0	50	1
Descriptives
CEFR				Statistic	Std. Error
Hlex	B1	Mean		4.125	0.0122899
		95% Confidence Interval for Mean	Lower Bound	4.1003
			Upper Bound	4.1497
		5% Trimmed Mean		4.13156
		Median		4.13
		Variance		0.00755204
		Std. Deviation		0.0869025
		Minimum		3.82
		Maximum		4.25
		Range		0.43
		Interquartile Range		0.11
		Skewness		-1.15931	0.336601
		Kurtosis		2.37518	0.661908
	B2	Mean		4.438	0.00419913
		95% Confidence Interval for Mean	Lower Bound	4.42956
			Upper Bound	4.44644
		5% Trimmed Mean		4.43689
		Median		4.44
		Variance		0.000881633
		Std. Deviation		0.0296923
		Minimum		4.35
		Maximum		4.55
		Range		0.2
		Interquartile Range		0.03
		Skewness		0.826377	0.336601
		Kurtosis		4.84636	0.661908
	C1	Mean		4.8352	0.00460913
		95% Confidence Interval for Mean	Lower Bound	4.82594
			Upper Bound	4.84446
		5% Trimmed Mean		4.83344
		Median		4.83
		Variance		0.0010622
		Std. Deviation		0.0325915
		Minimum		4.75
		Maximum		4.95
		Range		0.2
		Interquartile Range		0.03
		Skewness		1.08999	0.336601
		Kurtosis		3.67221	0.661908
	L1	Mean		5.2546	0.00637732
		95% Confidence Interval for Mean	Lower Bound	5.24178
			Upper Bound	5.26742
		5% Trimmed Mean		5.25422
		Median		5.25
		Variance		0.00203351
		Std. Deviation		0.0450945
		Minimum		5.12
		Maximum		5.42
		Range		0.3
		Interquartile Range		0.05
		Skewness		0.393427	0.336601
		Kurtosis		4.38432	0.661908
PCI	B1	Mean		0.8914	0.00448134
		95% Confidence Interval for Mean	Lower Bound	0.882394
			Upper Bound	0.900406
		5% Trimmed Mean		0.892778
		Median		0.89
		Variance		0.00100412
		Std. Deviation		0.0316879
		Minimum		0.81
		Maximum		0.94
		Range		0.13
		Interquartile Range		0.035
		Skewness		-0.490255	0.336601
		Kurtosis		-0.0204474	0.661908
	B2	Mean		1.0612	0.00233238
		95% Confidence Interval for Mean	Lower Bound	1.05651
			Upper Bound	1.06589
		5% Trimmed Mean		1.06056
		Median		1.06
		Variance		0.000272
		Std. Deviation		0.0164924
		Minimum		1.02
		Maximum		1.12
		Range		0.1
		Interquartile Range		0.02
		Skewness		0.79582	0.336601
		Kurtosis		3.0364	0.661908
	C1	Mean		1.1912	0.00231481
		95% Confidence Interval for Mean	Lower Bound	1.18655
			Upper Bound	1.19585
		5% Trimmed Mean		1.19056
		Median		1.19
		Variance		0.000267918
		Std. Deviation		0.0163682
		Minimum		1.15
		Maximum		1.25
		Range		0.1
		Interquartile Range		0.02
		Skewness		0.817565	0.336601
		Kurtosis		3.22066	0.661908
	L1	Mean		1.2788	0.00296428
		95% Confidence Interval for Mean	Lower Bound	1.27284
			Upper Bound	1.28476
		5% Trimmed Mean		1.27956
		Median		1.28
		Variance		0.000439347
		Std. Deviation		0.0209606
		Minimum		1.21
		Maximum		1.35
		Range		0.14
		Interquartile Range		0.02
		Skewness		-0.416475	0.336601
		Kurtosis		4.62621	0.661908
IDS_Total	B1	Mean		4.2252	0.0120212
		95% Confidence Interval for Mean	Lower Bound	4.20104
			Upper Bound	4.24936
		5% Trimmed Mean		4.22978
		Median		4.23
		Variance		0.00722547
		Std. Deviation		0.0850028
		Minimum		3.98
		Maximum		4.36
		Range		0.38
		Interquartile Range		0.115
		Skewness		-0.712194	0.336601
		Kurtosis		0.644987	0.661908
	B2	Mean		5.108	0.00486554
		95% Confidence Interval for Mean	Lower Bound	5.09822
			Upper Bound	5.11778
		5% Trimmed Mean		5.10589
		Median		5.105
		Variance		0.00118367
		Std. Deviation		0.0344046
		Minimum		5.02
		Maximum		5.25
		Range		0.23
		Interquartile Range		0.03
		Skewness		1.47647	0.336601
		Kurtosis		6.41001	0.661908
	C1	Mean		5.8998	0.00528757
		95% Confidence Interval for Mean	Lower Bound	5.88917
			Upper Bound	5.91043
		5% Trimmed Mean		5.89689
		Median		5.895
		Variance		0.00139792
		Std. Deviation		0.0373887
		Minimum		5.82
		Maximum		6.05
		Range		0.23
		Interquartile Range		0.03
		Skewness		1.64406	0.336601
		Kurtosis		5.37556	0.661908
	L1	Mean		6.4574	0.0082006
		95% Confidence Interval for Mean	Lower Bound	6.44092
			Upper Bound	6.47388
		5% Trimmed Mean		6.45489
		Median		6.45
		Variance		0.00336249
		Std. Deviation		0.057987
		Minimum		6.3
		Maximum		6.72
		Range		0.42
		Interquartile Range		0.05
		Skewness		1.58059	0.336601
		Kurtosis		8.71283	0.661908
KLgram_Inv	B1	Mean		5.1408	0.0126389
		95% Confidence Interval for Mean	Lower Bound	5.1154
			Upper Bound	5.1662
		5% Trimmed Mean		5.14378
		Median		5.145
		Variance		0.0079871
		Std. Deviation		0.0893706
		Minimum		4.89
		Maximum		5.3
		Range		0.41
		Interquartile Range		0.125
		Skewness		-0.402568	0.336601
		Kurtosis		0.249675	0.661908
	B2	Mean		5.5176	0.00365402
		95% Confidence Interval for Mean	Lower Bound	5.51026
			Upper Bound	5.52494
		5% Trimmed Mean		5.51656
		Median		5.52
		Variance		0.000667592
		Std. Deviation		0.0258378
		Minimum		5.45
		Maximum		5.62
		Range		0.17
		Interquartile Range		0.0225
		Skewness		1.06017	0.336601
		Kurtosis		5.32178	0.661908
	C1	Mean		6.0332	0.00397379
		95% Confidence Interval for Mean	Lower Bound	6.02521
			Upper Bound	6.04119
		5% Trimmed Mean		6.03256
		Median		6.03
		Variance		0.000789551
		Std. Deviation		0.028099
		Minimum		5.95
		Maximum		6.12
		Range		0.17
		Interquartile Range		0.03
		Skewness		0.416782	0.336601
		Kurtosis		2.51945	0.661908
	L1	Mean		6.8782	0.00129961
		95% Confidence Interval for Mean	Lower Bound	6.87559
			Upper Bound	6.88081
		5% Trimmed Mean		6.87844
		Median		6.88
		Variance		8.4449e-05
		Std. Deviation		0.00918961
		Minimum		6.85
		Maximum		6.9
		Range		0.05
		Interquartile Range		0.01
		Skewness		-0.28388	0.336601
		Kurtosis		0.799987	0.661908
CR_Inv	B1	Mean		6.3364	0.0023519
		95% Confidence Interval for Mean	Lower Bound	6.33167
			Upper Bound	6.34113
		5% Trimmed Mean		6.337
		Median		6.34
		Variance		0.000276571
		Std. Deviation		0.0166304
		Minimum		6.29
		Maximum		6.37
		Range		0.08
		Interquartile Range		0.02
		Skewness		-0.422006	0.336601
		Kurtosis		0.318378	0.661908
	B2	Mean		6.3856	0.00118356
		95% Confidence Interval for Mean	Lower Bound	6.38322
			Upper Bound	6.38798
		5% Trimmed Mean		6.38567
		Median		6.39
		Variance		7.00408e-05
		Std. Deviation		0.00836904
		Minimum		6.37
		Maximum		6.4
		Range		0.03
		Interquartile Range		0.01
		Skewness		-0.0884323	0.336601
		Kurtosis		-0.467026	0.661908
	C1	Mean		6.4208	0.00120678
		95% Confidence Interval for Mean	Lower Bound	6.41837
			Upper Bound	6.42323
		5% Trimmed Mean		6.42067
		Median		6.42
		Variance		7.28163e-05
		Std. Deviation		0.00853325
		Minimum		6.41
		Maximum		6.44
		Range		0.03
		Interquartile Range		0.02
		Skewness		0.0482812	0.336601
		Kurtosis		-1.18388	0.661908
	L1	Mean		6.4814	0.00117838
		95% Confidence Interval for Mean	Lower Bound	6.47903
			Upper Bound	6.48377
		5% Trimmed Mean		6.48156
		Median		6.48
		Variance		6.94286e-05
		Std. Deviation		0.00833238
		Minimum		6.46
		Maximum		6.5
		Range		0.04
		Interquartile Range		0.01
		Skewness		-0.272871	0.336601
		Kurtosis		-0.362744	0.661908
Tests of Normality
CEFR		Kolmogorov-Smirnova			Shapiro-Wilk
		Statistic	df	Sig.	Statistic	df	Sig.
Hlex	B1	0.114059	50	0.110023	0.922714	50	0.00295948
	B2	0.183053	50	0.000231991	0.881207	50	0.000121764
	C1	0.164876	50	0.00162269	0.886264	50	0.000174307
	L1	0.132697	50	0.0278784	0.907286	50	0.000843648
PCI	B1	0.119514	50	0.071636	0.960858	50	0.0965653
	B2	0.176817	50	0.000464807	0.912997	50	0.00132881
	C1	0.189221	50	0.000113411	0.907401	50	0.000851305
	L1	0.217303	50	3.0555e-06	0.861597	50	3.23731e-05
IDS_Total	B1	0.083439	50	.200*	0.960476	50	0.0930742
	B2	0.203623	50	1.91145e-05	0.836416	50	6.76666e-06
	C1	0.174506	50	0.000596951	0.862545	50	3.44347e-05
	L1	0.148363	50	0.0076839	0.837635	50	7.27643e-06
KLgram_Inv	B1	0.0681531	50	.200*	0.979774	50	0.542458
	B2	0.195643	50	5.2249e-05	0.870674	50	5.90212e-05
	C1	0.145335	50	0.00999847	0.931019	50	0.00604043
	L1	0.217645	50	2.91325e-06	0.88702	50	0.00018404
CR_Inv	B1	0.150179	50	0.00654043	0.956381	50	0.0627231
	B2	0.240468	50	9.98789e-08	0.871168	50	6.10183e-05
	C1	0.219513	50	2.24267e-06	0.834177	50	5.92603e-06
	L1	0.213284	50	5.31193e-06	0.870412	50	5.79897e-05
*. This is a lower bound of the true significance.
a. Lilliefors Significance Correction
Test of Homogeneity of Variance
		Levene Statistic	df1	df2	Sig.
Hlex	Based on Mean	15.725	3	196	3.3381e-09
	Based on Median	15.4485	3	196	4.6341e-09
	Based on Median and with adjusted df	15.4485	3	117.67	1.5466e-08
	Based on trimmed mean	15.4606	3	196	4.56825e-09
PCI	Based on Mean	8.99723	3	196	1.30358e-05
	Based on Median	8.97557	3	196	1.34002e-05
	Based on Median and with adjusted df	8.97557	3	166.792	1.5177e-05
	Based on trimmed mean	9.30538	3	196	8.81034e-06
IDS_Total	Based on Mean	13.0293	3	196	8.5358e-08
	Based on Median	12.391	3	196	1.86535e-07
	Based on Median and with adjusted df	12.391	3	149.15	2.78509e-07
	Based on trimmed mean	12.5958	3	196	1.45074e-07
KLgram_Inv	Based on Mean	43.3428	3	196	1.56841e-21
	Based on Median	43.1243	3	196	1.90746e-21
	Based on Median and with adjusted df	43.1243	3	78.4638	1.4339e-16
	Based on trimmed mean	43.2398	3	196	1.7199e-21
CR_Inv	Based on Mean	11.4367	3	196	6.06395e-07
	Based on Median	8.66284	3	196	1.99686e-05
	Based on Median and with adjusted df	8.66284	3	132.006	2.73501e-05
	Based on trimmed mean	11.1307	3	196	8.87169e-07
Hlex
Stem-and-Leaf Plots
Hlex Stem-and-Leaf Plot for
CEFR= B1
Frequency Stem & Leaf
2.00 Extremes (=<3.91)
.00 39 .
2.00 39 . 58
.00 40 .
12.00 40 . 555567888999
12.00 41 . 001112223344
11.00 41 . 55556778899
8.00 42 . 00112234
3.00 42 . 555
Stem width: 0
Each leaf: 1 case(s)
Hlex Stem-and-Leaf Plot for
CEFR= B2
Frequency Stem & Leaf
1.00 Extremes (=<4.350)
1.00 438 . 0
.00 439 .
.00 440 .
5.00 441 . 00000
7.00 442 . 0000000
9.00 443 . 000000000
11.00 444 . 00000000000
8.00 445 . 00000000
4.00 446 . 0000
.00 447 .
1.00 448 . 0
1.00 449 . 0
2.00 Extremes (>=4.510)
Stem width: 0
Each leaf: 1 case(s)
Hlex Stem-and-Leaf Plot for
CEFR= C1
Frequency Stem & Leaf
1.00 Extremes (=<4.750)
1.00 478 . 0
.00 479 .
2.00 480 . 00
7.00 481 . 0000000
7.00 482 . 0000000
11.00 483 . 00000000000
7.00 484 . 0000000
6.00 485 . 000000
4.00 486 . 0000
.00 487 .
.00 488 .
1.00 489 . 0
3.00 Extremes (>=4.910)
Stem width: 0
Each leaf: 1 case(s)
Hlex Stem-and-Leaf Plot for
CEFR= L1
Frequency Stem & Leaf
2.00 Extremes (=<5.15)
1.00 51 . 8
16.00 52 . 1122233333444444
26.00 52 . 55555556666666777788888999
3.00 53 . 002
1.00 53 . 5
1.00 Extremes (>=5.42)
Stem width: 0
Each leaf: 1 case(s)
Normal Q-Q Plots
Detrended Normal Q-Q Plots
PCI
Stem-and-Leaf Plots
PCI Stem-and-Leaf Plot for
CEFR= B1
Frequency Stem & Leaf
3.00 Extremes (=<.830)
1.00 84 . 0
3.00 85 . 000
2.00 86 . 00
3.00 87 . 000
8.00 88 . 00000000
7.00 89 . 0000000
6.00 90 . 000000
5.00 91 . 00000
3.00 92 . 000
5.00 93 . 00000
4.00 94 . 0000
Stem width: 0
Each leaf: 1 case(s)
PCI Stem-and-Leaf Plot for
CEFR= B2
Frequency Stem & Leaf
1.00 102 . 0
1.00 103 . 0
3.00 104 . 000
12.00 105 . 000000000000
15.00 106 . 000000000000000
12.00 107 . 000000000000
3.00 108 . 000
1.00 109 . 0
1.00 110 . 0
1.00 Extremes (>=1.120)
Stem width: 0
Each leaf: 1 case(s)
PCI Stem-and-Leaf Plot for
CEFR= C1
Frequency Stem & Leaf
1.00 115 . 0
1.00 116 . 0
3.00 117 . 000
11.00 118 . 00000000000
17.00 119 . 00000000000000000
11.00 120 . 00000000000
3.00 121 . 000
1.00 122 . 0
1.00 123 . 0
1.00 Extremes (>=1.250)
Stem width: 0
Each leaf: 1 case(s)
PCI Stem-and-Leaf Plot for
CEFR= L1
Frequency Stem & Leaf
2.00 Extremes (=<1.220)
1.00 124 . 0
1.00 125 . 0
2.00 126 . 00
11.00 127 . 00000000000
17.00 128 . 00000000000000000
9.00 129 . 000000000
5.00 130 . 00000
1.00 131 . 0
1.00 Extremes (>=1.350)
Stem width: 0
Each leaf: 1 case(s)
Normal Q-Q Plots
Detrended Normal Q-Q Plots
IDS_Total
Stem-and-Leaf Plots
IDS_Total Stem-and-Leaf Plot for
CEFR= B1
Frequency Stem & Leaf
1.00 Extremes (=<3.98)
1.00 40 . 2
2.00 40 . 59
3.00 41 . 234
8.00 41 . 55777889
14.00 42 . 00000112333444
9.00 42 . 556777789
9.00 43 . 000013334
3.00 43 . 566
Stem width: 0
Each leaf: 1 case(s)
IDS_Total Stem-and-Leaf Plot for
CEFR= B2
Frequency Stem & Leaf
2.00 Extremes (=<5.040)
6.00 508 . 000000
9.00 509 . 000000000
8.00 510 . 00000000
8.00 511 . 00000000
9.00 512 . 000000000
4.00 513 . 0000
.00 514 .
1.00 515 . 0
3.00 Extremes (>=5.170)
Stem width: 0
Each leaf: 1 case(s)
IDS_Total Stem-and-Leaf Plot for
CEFR= C1
Frequency Stem & Leaf
1.00 Extremes (=<5.820)
1.00 584 . 0
.00 585 .
3.00 586 . 000
5.00 587 . 00000
6.00 588 . 000000
9.00 589 . 000000000
7.00 590 . 0000000
7.00 591 . 0000000
5.00 592 . 00000
2.00 593 . 00
.00 594 .
1.00 595 . 0
3.00 Extremes (>=5.980)
Stem width: 0
Each leaf: 1 case(s)
IDS_Total Stem-and-Leaf Plot for
CEFR= L1
Frequency Stem & Leaf
2.00 Extremes (=<6.35)
1.00 63 . 8
17.00 64 . 11112223333344444
23.00 64 . 55555556667777788888999
5.00 65 . 00112
2.00 Extremes (>=6.58)
Stem width: 0
Each leaf: 1 case(s)
Normal Q-Q Plots
Detrended Normal Q-Q Plots
KLgram_Inv
Stem-and-Leaf Plots
KLgram_Inv Stem-and-Leaf Plot for
CEFR= B1
Frequency Stem & Leaf
1.00 Extremes (=<4.89)
.00 49 .
2.00 49 . 58
2.00 50 . 04
10.00 50 . 5556888899
10.00 51 . 0112222234
11.00 51 . 55556678999
8.00 52 . 00223334
4.00 52 . 6678
2.00 53 . 00
Stem width: .10
Each leaf: 1 case(s)
KLgram_Inv Stem-and-Leaf Plot for
CEFR= B2
Frequency Stem & Leaf
2.00 Extremes (=<5.460)
3.00 549 . 000
7.00 550 . 0000000
12.00 551 . 000000000000
11.00 552 . 00000000000
9.00 553 . 000000000
2.00 554 . 00
1.00 555 . 0
1.00 556 . 0
2.00 Extremes (>=5.580)
Stem width: .01
Each leaf: 1 case(s)
KLgram_Inv Stem-and-Leaf Plot for
CEFR= C1
Frequency Stem & Leaf
1.00 Extremes (=<5.950)
1.00 598 . 0
.00 599 .
2.00 600 . 00
6.00 601 . 000000
9.00 602 . 000000000
11.00 603 . 00000000000
6.00 604 . 000000
7.00 605 . 0000000
3.00 606 . 000
.00 607 .
1.00 608 . 0
1.00 609 . 0
2.00 Extremes (>=6.100)
Stem width: .01
Each leaf: 1 case(s)
KLgram_Inv Stem-and-Leaf Plot for
CEFR= L1
Frequency Stem & Leaf
1.00 Extremes (=<6.850)
1.00 686 . 0
.00 686 .
16.00 687 . 0000000000000000
.00 687 .
21.00 688 . 000000000000000000000
.00 688 .
10.00 689 . 0000000000
1.00 Extremes (>=6.900)
Stem width: .01
Each leaf: 1 case(s)
Normal Q-Q Plots
Detrended Normal Q-Q Plots
CR_Inv
Stem-and-Leaf Plots
CR_Inv Stem-and-Leaf Plot for
CEFR= B1
Frequency Stem & Leaf
2.00 Extremes (=<6.300)
3.00 631 . 000
.00 631 .
5.00 632 . 00000
.00 632 .
13.00 633 . 0000000000000
.00 633 .
12.00 634 . 000000000000
.00 634 .
8.00 635 . 00000000
.00 635 .
6.00 636 . 000000
.00 636 .
1.00 637 . 0
Stem width: .01
Each leaf: 1 case(s)
CR_Inv Stem-and-Leaf Plot for
CEFR= B2
Frequency Stem & Leaf
5.00 637 . 00000
.00 637 .
18.00 638 . 000000000000000000
.00 638 .
21.00 639 . 000000000000000000000
.00 639 .
6.00 640 . 000000
Stem width: .01
Each leaf: 1 case(s)
CR_Inv Stem-and-Leaf Plot for
CEFR= C1
Frequency Stem & Leaf
15.00 641 . 000000000000000
.00 641 .
17.00 642 . 00000000000000000
.00 642 .
17.00 643 . 00000000000000000
.00 643 .
1.00 644 . 0
Stem width: .01
Each leaf: 1 case(s)
CR_Inv Stem-and-Leaf Plot for
CEFR= L1
Frequency Stem & Leaf
1.00 Extremes (=<6.460)
10.00 647 . 0000000000
.00 647 .
21.00 648 . 000000000000000000000
.00 648 .
17.00 649 . 00000000000000000
.00 649 .
1.00 650 . 0
Stem width: .01
Each leaf: 1 case(s)
Normal Q-Q Plots
Detrended Normal Q-Q Plots
