# Supplementary material for: Measuring information density in interlanguage through entropy analysis
Source: Sci Rep. 2026 Jun 16;16:18672. doi: 10.1038/s41598-026-56853-3 (PMC13273071; doi:10.1038/s41598-026-56853-3)
Supplement: Supplementary file 6 — Supplementary Material 6 [file 41598_2026_56853_MOESM6_ESM.xlsx]

## Sheet: Sheet1
EXAMINE VARIABLES=Hlex PCI IDS_Total KLgram_Inv CR_Inv BY Group_A
/PLOT BOXPLOT STEMLEAF NPPLOT SPREADLEVEL
/COMPARE GROUPS
/STATISTICS DESCRIPTIVES
/CINTERVAL 95
/MISSING LISTWISE
/NOTOTAL.
Explore
Notes
Output Created		01-APR-2026 17:11:53
Comments
Input	Active Dataset	$DataSet
	Filter	<none>
	Weight	<none>
	Split File	<none>
	N of Rows in Working Data File	200
Missing Value Handling	Definition of Missing	User-defined missing values for dependent variables are treated as missing.
	Cases Used	Statistics are based on cases with no missing values for any dependent variable or factor used.
Syntax		EXAMINE VARIABLES=Hlex PCI IDS_Total KLgram_Inv CR_Inv BY Group_A /PLOT BOXPLOT STEMLEAF NPPLOT SPREADLEVEL /COMPARE GROUPS /STATISTICS DESCRIPTIVES /CINTERVAL 95 /MISSING LISTWISE /NOTOTAL.
Resources	Processor Time	00:00:28.14
	Elapsed Time	00:00:27.82
Group
Case Processing Summary
Group		Cases
		Valid		Missing		Total
		N	Percent	N	Percent	N	Percent
Hlex	B1	45	1	0	0	45	1
	B2	55	1	0	0	55	1
	C1	43	1	0	0	43	1
	L1	57	1	0	0	57	1
PCI	B1	45	1	0	0	45	1
	B2	55	1	0	0	55	1
	C1	43	1	0	0	43	1
	L1	57	1	0	0	57	1
IDS_Total	B1	45	1	0	0	45	1
	B2	55	1	0	0	55	1
	C1	43	1	0	0	43	1
	L1	57	1	0	0	57	1
KLgram_Inv	B1	45	1	0	0	45	1
	B2	55	1	0	0	55	1
	C1	43	1	0	0	43	1
	L1	57	1	0	0	57	1
CR_Inv	B1	45	1	0	0	45	1
	B2	55	1	0	0	55	1
	C1	43	1	0	0	43	1
	L1	57	1	0	0	57	1
Descriptives
Group				Statistic	Std. Error
Hlex	B1	Mean		4.13133	0.0129162
		95% Confidence Interval for Mean	Lower Bound	4.1053
			Upper Bound	4.15736
		5% Trimmed Mean		4.13883
		Median		4.14
		Variance		0.00750727
		Std. Deviation		0.0866445
		Minimum		3.82
		Maximum		4.25
		Range		0.43
		Interquartile Range		0.11
		Skewness		-1.32561	0.353732
		Kurtosis		3.08586	0.694544
	B2	Mean		4.40436	0.0152107
		95% Confidence Interval for Mean	Lower Bound	4.37387
			Upper Bound	4.43486
		5% Trimmed Mean		4.41909
		Median		4.43
		Variance		0.0127251
		Std. Deviation		0.112805
		Minimum		3.95
		Maximum		4.55
		Range		0.6
		Interquartile Range		0.03
		Skewness		-2.75879	0.321742
		Kurtosis		7.21827	0.633507
	C1	Mean		4.83674	0.00527978
		95% Confidence Interval for Mean	Lower Bound	4.82609
			Upper Bound	4.8474
		5% Trimmed Mean		4.83523
		Median		4.83
		Variance		0.00119867
		Std. Deviation		0.0346218
		Minimum		4.75
		Maximum		4.95
		Range		0.2
		Interquartile Range		0.03
		Skewness		0.949024	0.361358
		Kurtosis		2.97587	0.709035
	L1	Mean		5.20193	0.0196307
		95% Confidence Interval for Mean	Lower Bound	5.1626
			Upper Bound	5.24125
		5% Trimmed Mean		5.21444
		Median		5.25
		Variance		0.0219659
		Std. Deviation		0.148209
		Minimum		4.81
		Maximum		5.42
		Range		0.61
		Interquartile Range		0.05
		Skewness		-1.98446	0.316327
		Kurtosis		2.79837	0.623134
PCI	B1	Mean		0.893778	0.00470642
		95% Confidence Interval for Mean	Lower Bound	0.884293
			Upper Bound	0.903263
		5% Trimmed Mean		0.895432
		Median		0.89
		Variance		0.000996768
		Std. Deviation		0.0315716
		Minimum		0.81
		Maximum		0.94
		Range		0.13
		Interquartile Range		0.04
		Skewness		-0.59139	0.353732
		Kurtosis		0.176484	0.694544
	B2	Mean		1.04382	0.00783453
		95% Confidence Interval for Mean	Lower Bound	1.02811
			Upper Bound	1.05953
		5% Trimmed Mean		1.05096
		Median		1.06
		Variance		0.00337589
		Std. Deviation		0.0581024
		Minimum		0.83
		Maximum		1.12
		Range		0.29
		Interquartile Range		0.02
		Skewness		-2.60887	0.321742
		Kurtosis		6.19686	0.633507
	C1	Mean		1.19116	0.00264574
		95% Confidence Interval for Mean	Lower Bound	1.18582
			Upper Bound	1.1965
		5% Trimmed Mean		1.19048
		Median		1.19
		Variance		0.000300997
		Std. Deviation		0.0173493
		Minimum		1.15
		Maximum		1.25
		Range		0.1
		Interquartile Range		0.02
		Skewness		0.816891	0.361358
		Kurtosis		2.81645	0.709035
	L1	Mean		1.26807	0.00464557
		95% Confidence Interval for Mean	Lower Bound	1.25876
			Upper Bound	1.27738
		5% Trimmed Mean		1.26985
		Median		1.28
		Variance		0.00123014
		Std. Deviation		0.0350733
		Minimum		1.18
		Maximum		1.35
		Range		0.17
		Interquartile Range		0.02
		Skewness		-1.15374	0.316327
		Kurtosis		1.19659	0.623134
IDS_Total	B1	Mean		4.23222	0.0125686
		95% Confidence Interval for Mean	Lower Bound	4.20689
			Upper Bound	4.25755
		5% Trimmed Mean		4.23753
		Median		4.24
		Variance		0.00710859
		Std. Deviation		0.0843124
		Minimum		3.98
		Maximum		4.36
		Range		0.38
		Interquartile Range		0.115
		Skewness		-0.844068	0.353732
		Kurtosis		1.01731	0.694544
	B2	Mean		5.022	0.0373575
		95% Confidence Interval for Mean	Lower Bound	4.9471
			Upper Bound	5.0969
		5% Trimmed Mean		5.06157
		Median		5.1
		Variance		0.076757
		Std. Deviation		0.277051
		Minimum		4.05
		Maximum		5.25
		Range		1.2
		Interquartile Range		0.03
		Skewness		-2.87456	0.321742
		Kurtosis		6.76785	0.633507
	C1	Mean		5.90023	0.00610437
		95% Confidence Interval for Mean	Lower Bound	5.88791
			Upper Bound	5.91255
		5% Trimmed Mean		5.89726
		Median		5.89
		Variance		0.00160233
		Std. Deviation		0.0400291
		Minimum		5.82
		Maximum		6.05
		Range		0.23
		Interquartile Range		0.04
		Skewness		1.54485	0.361358
		Kurtosis		4.46093	0.709035
	L1	Mean		6.3886	0.0256084
		95% Confidence Interval for Mean	Lower Bound	6.3373
			Upper Bound	6.4399
		5% Trimmed Mean		6.40432
		Median		6.45
		Variance		0.0373801
		Std. Deviation		0.193339
		Minimum		5.88
		Maximum		6.72
		Range		0.84
		Interquartile Range		0.065
		Skewness		-1.9661	0.316327
		Kurtosis		2.88733	0.623134
KLgram_Inv	B1	Mean		5.148	0.0133394
		95% Confidence Interval for Mean	Lower Bound	5.12112
			Upper Bound	5.17488
		5% Trimmed Mean		5.15185
		Median		5.15
		Variance		0.00800727
		Std. Deviation		0.0894834
		Minimum		4.89
		Maximum		5.3
		Range		0.41
		Interquartile Range		0.135
		Skewness		-0.535781	0.353732
		Kurtosis		0.495526	0.694544
	B2	Mean		5.47745	0.0177415
		95% Confidence Interval for Mean	Lower Bound	5.44188
			Upper Bound	5.51302
		5% Trimmed Mean		5.49566
		Median		5.51
		Variance		0.0173119
		Std. Deviation		0.131575
		Minimum		4.98
		Maximum		5.62
		Range		0.64
		Interquartile Range		0.03
		Skewness		-2.82621	0.321742
		Kurtosis		6.96766	0.633507
	C1	Mean		6.03372	0.00459938
		95% Confidence Interval for Mean	Lower Bound	6.02444
			Upper Bound	6.043
		5% Trimmed Mean		6.03324
		Median		6.03
		Variance		0.000909635
		Std. Deviation		0.0301601
		Minimum		5.95
		Maximum		6.12
		Range		0.17
		Interquartile Range		0.03
		Skewness		0.34525	0.361358
		Kurtosis		1.86727	0.709035
	L1	Mean		6.77404	0.0372209
		95% Confidence Interval for Mean	Lower Bound	6.69947
			Upper Bound	6.8486
		5% Trimmed Mean		6.80912
		Median		6.88
		Variance		0.0789674
		Std. Deviation		0.281011
		Minimum		6.02
		Maximum		6.9
		Range		0.88
		Interquartile Range		0.01
		Skewness		-2.35708	0.316327
		Kurtosis		3.69426	0.623134
CR_Inv	B1	Mean		6.33778	0.00243893
		95% Confidence Interval for Mean	Lower Bound	6.33286
			Upper Bound	6.34269
		5% Trimmed Mean		6.33833
		Median		6.34
		Variance		0.000267677
		Std. Deviation		0.0163608
		Minimum		6.29
		Maximum		6.37
		Range		0.08
		Interquartile Range		0.02
		Skewness		-0.472425	0.353732
		Kurtosis		0.476647	0.694544
	B2	Mean		6.38	0.0026968
		95% Confidence Interval for Mean	Lower Bound	6.37459
			Upper Bound	6.38541
		5% Trimmed Mean		6.38247
		Median		6.38
		Variance		0.0004
		Std. Deviation		0.02
		Minimum		6.3
		Maximum		6.4
		Range		0.1
		Interquartile Range		0.01
		Skewness		-2.34932	0.321742
		Kurtosis		5.90602	0.633507
	C1	Mean		6.42116	0.00129781
		95% Confidence Interval for Mean	Lower Bound	6.41854
			Upper Bound	6.42378
		5% Trimmed Mean		6.42103
		Median		6.42
		Variance		7.24252e-05
		Std. Deviation		0.0085103
		Minimum		6.41
		Maximum		6.44
		Range		0.03
		Interquartile Range		0.02
		Skewness		0.0130152	0.361358
		Kurtosis		-1.11256	0.709035
	L1	Mean		6.47368	0.00296842
		95% Confidence Interval for Mean	Lower Bound	6.46774
			Upper Bound	6.47963
		5% Trimmed Mean		6.47612
		Median		6.48
		Variance		0.000502256
		Std. Deviation		0.0224111
		Minimum		6.41
		Maximum		6.5
		Range		0.09
		Interquartile Range		0.02
		Skewness		-1.9018	0.316327
		Kurtosis		2.74171	0.623134
Tests of Normality
Group		Kolmogorov-Smirnova			Shapiro-Wilk
		Statistic	df	Sig.	Statistic	df	Sig.
Hlex	B1	0.107275	45	.200*	0.9069	45	0.0015648
	B2	0.392652	55	5.89172e-24	0.567069	55	1.74072e-11
	C1	0.16486	43	0.00490239	0.903581	43	0.00160945
	L1	0.346274	57	4.66742e-19	0.643119	57	1.64597e-10
PCI	B1	0.109052	45	.200*	0.953982	45	0.0719639
	B2	0.360547	55	5.10429e-20	0.589965	55	3.80562e-11
	C1	0.201137	43	0.000144079	0.91491	43	0.003661
	L1	0.29387	57	1.77566e-13	0.818347	57	6.72134e-07
IDS_Total	B1	0.0844986	45	.200*	0.951331	45	0.0570485
	B2	0.455639	55	9.79238e-33	0.436907	55	3.2787e-13
	C1	0.171179	43	0.00281817	0.875815	43	0.000249866
	L1	0.368636	57	9.62513e-22	0.630912	57	1.03103e-10
KLgram_Inv	B1	0.0680963	45	.200*	0.972526	45	0.356365
	B2	0.410708	55	2.49049e-26	0.506296	55	2.48686e-12
	C1	0.131893	43	0.0581025	0.947623	43	0.0488366
	L1	0.483739	57	1.90175e-38	0.413092	57	9.65761e-14
CR_Inv	B1	0.139477	45	0.0281739	0.952685	45	0.0642279
	B2	0.318182	55	2.23321e-15	0.695887	55	2.21617e-09
	C1	0.222554	43	1.2077e-05	0.84029	43	3.0018e-05
	L1	0.295168	57	1.3279e-13	0.698983	57	1.62423e-09
*. This is a lower bound of the true significance.
a. Lilliefors Significance Correction
Test of Homogeneity of Variance
		Levene Statistic	df1	df2	Sig.
Hlex	Based on Mean	6.67465	3	196	0.000258959
	Based on Median	2.91122	3	196	0.0356485
	Based on Median and with adjusted df	2.91122	3	125.308	0.0371313
	Based on trimmed mean	4.85688	3	196	0.00278512
PCI	Based on Mean	4.14156	3	196	0.00712313
	Based on Median	1.93982	3	196	0.124464
	Based on Median and with adjusted df	1.93982	3	105.107	0.127662
	Based on trimmed mean	2.62374	3	196	0.0517747
IDS_Total	Based on Mean	7.81739	3	196	5.90515e-05
	Based on Median	2.14258	3	196	0.0961635
	Based on Median and with adjusted df	2.14258	3	100.678	0.0995564
	Based on trimmed mean	4.14683	3	196	0.00707396
KLgram_Inv	Based on Mean	14.2319	3	196	1.98627e-08
	Based on Median	2.49098	3	196	0.0614689
	Based on Median and with adjusted df	2.49098	3	80.7572	0.0660577
	Based on trimmed mean	8.15938	3	196	3.80461e-05
CR_Inv	Based on Mean	3.30585	3	196	0.0213029
	Based on Median	1.83105	3	196	0.142803
	Based on Median and with adjusted df	1.83105	3	140.112	0.144288
	Based on trimmed mean	2.56661	3	196	0.0557473
Hlex
Stem-and-Leaf Plots
Hlex Stem-and-Leaf Plot for
Group_A= B1
Frequency Stem & Leaf
2.00 Extremes (=<3.91)
1.00 39 . 8
.00 40 .
10.00 40 . 5556788899
10.00 41 . 0011222334
11.00 41 . 55556778899
8.00 42 . 00112234
3.00 42 . 555
Stem width: 0
Each leaf: 1 case(s)
Hlex Stem-and-Leaf Plot for
Group_A= B2
Frequency Stem & Leaf
6.00 Extremes (=<4.35)
.00 43 .
1.00 43 . 8
5.00 44 . 11111
16.00 44 . 2222222333333333
19.00 44 . 4444444444455555555
4.00 44 . 6666
2.00 44 . 89
2.00 Extremes (>=4.51)
Stem width: 0
Each leaf: 1 case(s)
Hlex Stem-and-Leaf Plot for
Group_A= C1
Frequency Stem & Leaf
1.00 Extremes (=<4.750)
1.00 478 . 0
.00 479 .
2.00 480 . 00
5.00 481 . 00000
6.00 482 . 000000
9.00 483 . 000000000
5.00 484 . 00000
6.00 485 . 000000
4.00 486 . 0000
.00 487 .
.00 488 .
1.00 489 . 0
3.00 Extremes (>=4.910)
Stem width: 0
Each leaf: 1 case(s)
Hlex Stem-and-Leaf Plot for
Group_A= L1
Frequency Stem & Leaf
8.00 Extremes (=<5.12)
.00 51 .
2.00 51 . 58
16.00 52 . 1122233333444444
26.00 52 . 55555556666666777788888999
3.00 53 . 002
2.00 Extremes (>=5.35)
Stem width: 0
Each leaf: 1 case(s)
Normal Q-Q Plots
Detrended Normal Q-Q Plots
PCI
Stem-and-Leaf Plots
PCI Stem-and-Leaf Plot for
Group_A= B1
Frequency Stem & Leaf
1.00 Extremes (=<.81)
.00 8 .
1.00 8 . 2
4.00 8 . 4555
4.00 8 . 6777
13.00 8 . 8888889999999
10.00 9 . 0000011111
8.00 9 . 22233333
4.00 9 . 4444
Stem width: 0
Each leaf: 1 case(s)
PCI Stem-and-Leaf Plot for
Group_A= B2
Frequency Stem & Leaf
5.00 Extremes (=<.900)
1.00 102 . 0
1.00 103 . 0
3.00 104 . 000
12.00 105 . 000000000000
15.00 106 . 000000000000000
12.00 107 . 000000000000
3.00 108 . 000
1.00 109 . 0
1.00 110 . 0
1.00 Extremes (>=1.120)
Stem width: 0
Each leaf: 1 case(s)
PCI Stem-and-Leaf Plot for
Group_A= C1
Frequency Stem & Leaf
1.00 115 . 0
1.00 116 . 0
3.00 117 . 000
9.00 118 . 000000000
15.00 119 . 000000000000000
8.00 120 . 00000000
3.00 121 . 000
1.00 122 . 0
1.00 123 . 0
1.00 Extremes (>=1.250)
Stem width: 0
Each leaf: 1 case(s)
PCI Stem-and-Leaf Plot for
Group_A= L1
Frequency Stem & Leaf
9.00 Extremes (=<1.220)
1.00 124 . 0
1.00 125 . 0
2.00 126 . 00
11.00 127 . 00000000000
17.00 128 . 00000000000000000
9.00 129 . 000000000
5.00 130 . 00000
1.00 131 . 0
1.00 Extremes (>=1.350)
Stem width: 0
Each leaf: 1 case(s)
Normal Q-Q Plots
Detrended Normal Q-Q Plots
IDS_Total
Stem-and-Leaf Plots
IDS_Total Stem-and-Leaf Plot for
Group_A= B1
Frequency Stem & Leaf
2.00 Extremes (=<4.02)
1.00 40 . 9
3.00 41 . 234
6.00 41 . 577789
12.00 42 . 000011233444
9.00 42 . 556777789
9.00 43 . 000013334
3.00 43 . 566
Stem width: 0
Each leaf: 1 case(s)
IDS_Total Stem-and-Leaf Plot for
Group_A= B2
Frequency Stem & Leaf
7.00 Extremes (=<5.040)
6.00 508 . 000000
9.00 509 . 000000000
8.00 510 . 00000000
8.00 511 . 00000000
9.00 512 . 000000000
4.00 513 . 0000
.00 514 .
1.00 515 . 0
3.00 Extremes (>=5.170)
Stem width: 0
Each leaf: 1 case(s)
IDS_Total Stem-and-Leaf Plot for
Group_A= C1
Frequency Stem & Leaf
1.00 Extremes (=<5.820)
1.00 584 . 0
.00 585 .
3.00 586 . 000
5.00 587 . 00000
4.00 588 . 0000
8.00 589 . 00000000
6.00 590 . 000000
4.00 591 . 0000
5.00 592 . 00000
2.00 593 . 00
.00 594 .
1.00 595 . 0
3.00 Extremes (>=5.980)
Stem width: 0
Each leaf: 1 case(s)
IDS_Total Stem-and-Leaf Plot for
Group_A= L1
Frequency Stem & Leaf
8.00 Extremes (=<6.30)
.00 63 .
2.00 63 . 58
17.00 64 . 11112223333344444
23.00 64 . 55555556667777788888999
5.00 65 . 00112
2.00 Extremes (>=6.58)
Stem width: 0
Each leaf: 1 case(s)
Normal Q-Q Plots
Detrended Normal Q-Q Plots
KLgram_Inv
Stem-and-Leaf Plots
KLgram_Inv Stem-and-Leaf Plot for
Group_A= B1
Frequency Stem & Leaf
1.00 Extremes (=<4.89)
.00 49 .
1.00 49 . 5
2.00 50 . 04
9.00 50 . 556888899
7.00 51 . 1222223
11.00 51 . 55556678999
8.00 52 . 00223334
4.00 52 . 6678
2.00 53 . 00
Stem width: .10
Each leaf: 1 case(s)
KLgram_Inv Stem-and-Leaf Plot for
Group_A= B2
Frequency Stem & Leaf
6.00 Extremes (=<5.45)
.00 54 .
1.00 54 . 6
3.00 54 . 999
19.00 55 . 0000000111111111111
20.00 55 . 22222222222333333333
3.00 55 . 445
1.00 55 . 6
2.00 Extremes (>=5.58)
Stem width: .10
Each leaf: 1 case(s)
KLgram_Inv Stem-and-Leaf Plot for
Group_A= C1
Frequency Stem & Leaf
1.00 Extremes (=<5.950)
1.00 598 . 0
.00 599 .
2.00 600 . 00
6.00 601 . 000000
7.00 602 . 0000000
8.00 603 . 00000000
4.00 604 . 0000
7.00 605 . 0000000
3.00 606 . 000
.00 607 .
1.00 608 . 0
1.00 609 . 0
2.00 Extremes (>=6.100)
Stem width: .01
Each leaf: 1 case(s)
KLgram_Inv Stem-and-Leaf Plot for
Group_A= L1
Frequency Stem & Leaf
8.00 Extremes (=<6.850)
1.00 686 . 0
.00 686 .
16.00 687 . 0000000000000000
.00 687 .
21.00 688 . 000000000000000000000
.00 688 .
10.00 689 . 0000000000
1.00 Extremes (>=6.900)
Stem width: .01
Each leaf: 1 case(s)
Normal Q-Q Plots
Detrended Normal Q-Q Plots
CR_Inv
Stem-and-Leaf Plots
CR_Inv Stem-and-Leaf Plot for
Group_A= B1
Frequency Stem & Leaf
1.00 Extremes (=<6.290)
3.00 631 . 000
4.00 632 . 0000
11.00 633 . 00000000000
11.00 634 . 00000000000
8.00 635 . 00000000
6.00 636 . 000000
1.00 637 . 0
Stem width: .01
Each leaf: 1 case(s)
CR_Inv Stem-and-Leaf Plot for
Group_A= B2
Frequency Stem & Leaf
5.00 Extremes (=<6.340)
5.00 637 . 00000
.00 637 .
18.00 638 . 000000000000000000
.00 638 .
21.00 639 . 000000000000000000000
.00 639 .
6.00 640 . 000000
Stem width: .01
Each leaf: 1 case(s)
CR_Inv Stem-and-Leaf Plot for
Group_A= C1
Frequency Stem & Leaf
12.00 641 . 000000000000
.00 641 .
15.00 642 . 000000000000000
.00 642 .
15.00 643 . 000000000000000
.00 643 .
1.00 644 . 0
Stem width: .01
Each leaf: 1 case(s)
CR_Inv Stem-and-Leaf Plot for
Group_A= L1
Frequency Stem & Leaf
7.00 Extremes (=<6.430)
1.00 646 . 0
.00 646 .
10.00 647 . 0000000000
.00 647 .
21.00 648 . 000000000000000000000
.00 648 .
17.00 649 . 00000000000000000
.00 649 .
1.00 650 . 0
Stem width: .01
Each leaf: 1 case(s)
Normal Q-Q Plots
Detrended Normal Q-Q Plots
